# Supplementary material
Source: PubMed Central journal article supplement (PMC8804946)
Supplement: EMBJ-41-e109247-s005.pdf [file EMBJ-41-e109247-s005.pdf]

## Expanded View Figures

### Figure EV1. Evidence for the presence of phages at the plaque periphery during constriction.

- A PY79 (WT) cells were infected with low concentrations ( $10^{-8}$  PFU/ml) of SPP1<sup>-lysin-yfp</sup>, placed on an agarose pad, and plaque formation was followed by time-lapse confocal microscopy. Shown are overlay images of phase contrast (gray) and signal from Lysin<sup>-spp1</sup>-YFP (cyan) captured at the indicated time points (h) postinfection (left panels). Corresponding signal from Lysin<sup>-spp1</sup>-YFP (cyan) is shown separately (right panels). Scale bars, 50  $\mu$ m. Corresponds to Movie EV3.
- B Quantification of the SPP1<sup>-lysin-yfp</sup> fluorescence intensity (AU) at the indicated time points. Fluorescence from Z sections that include the plaque region and flanking area was measured. Corresponds to EV1A.
- C Quantification of the diameter of the YFP fluorescence (AU) ring, derived from SPP1<sup>-lysin-yfp</sup>. Corresponds to EV1A.
- D Screening for phage-resistant bacteria at the plaque rim. PY79 (WT) cells were infected with SPP1 ( $10^{-6}$  PFU/ml) and plated for plaque formation. At  $t = 18$  h, similar numbers of bacteria were collected from 30 "non-plaque" and 30 "plaque rim" regions, and bacterial smears were plated over plates with ( $10^{-4}$  PFU/ml) or without phages. No phage-resistant colonies were detected in both populations.

Source data are available online for this figure.

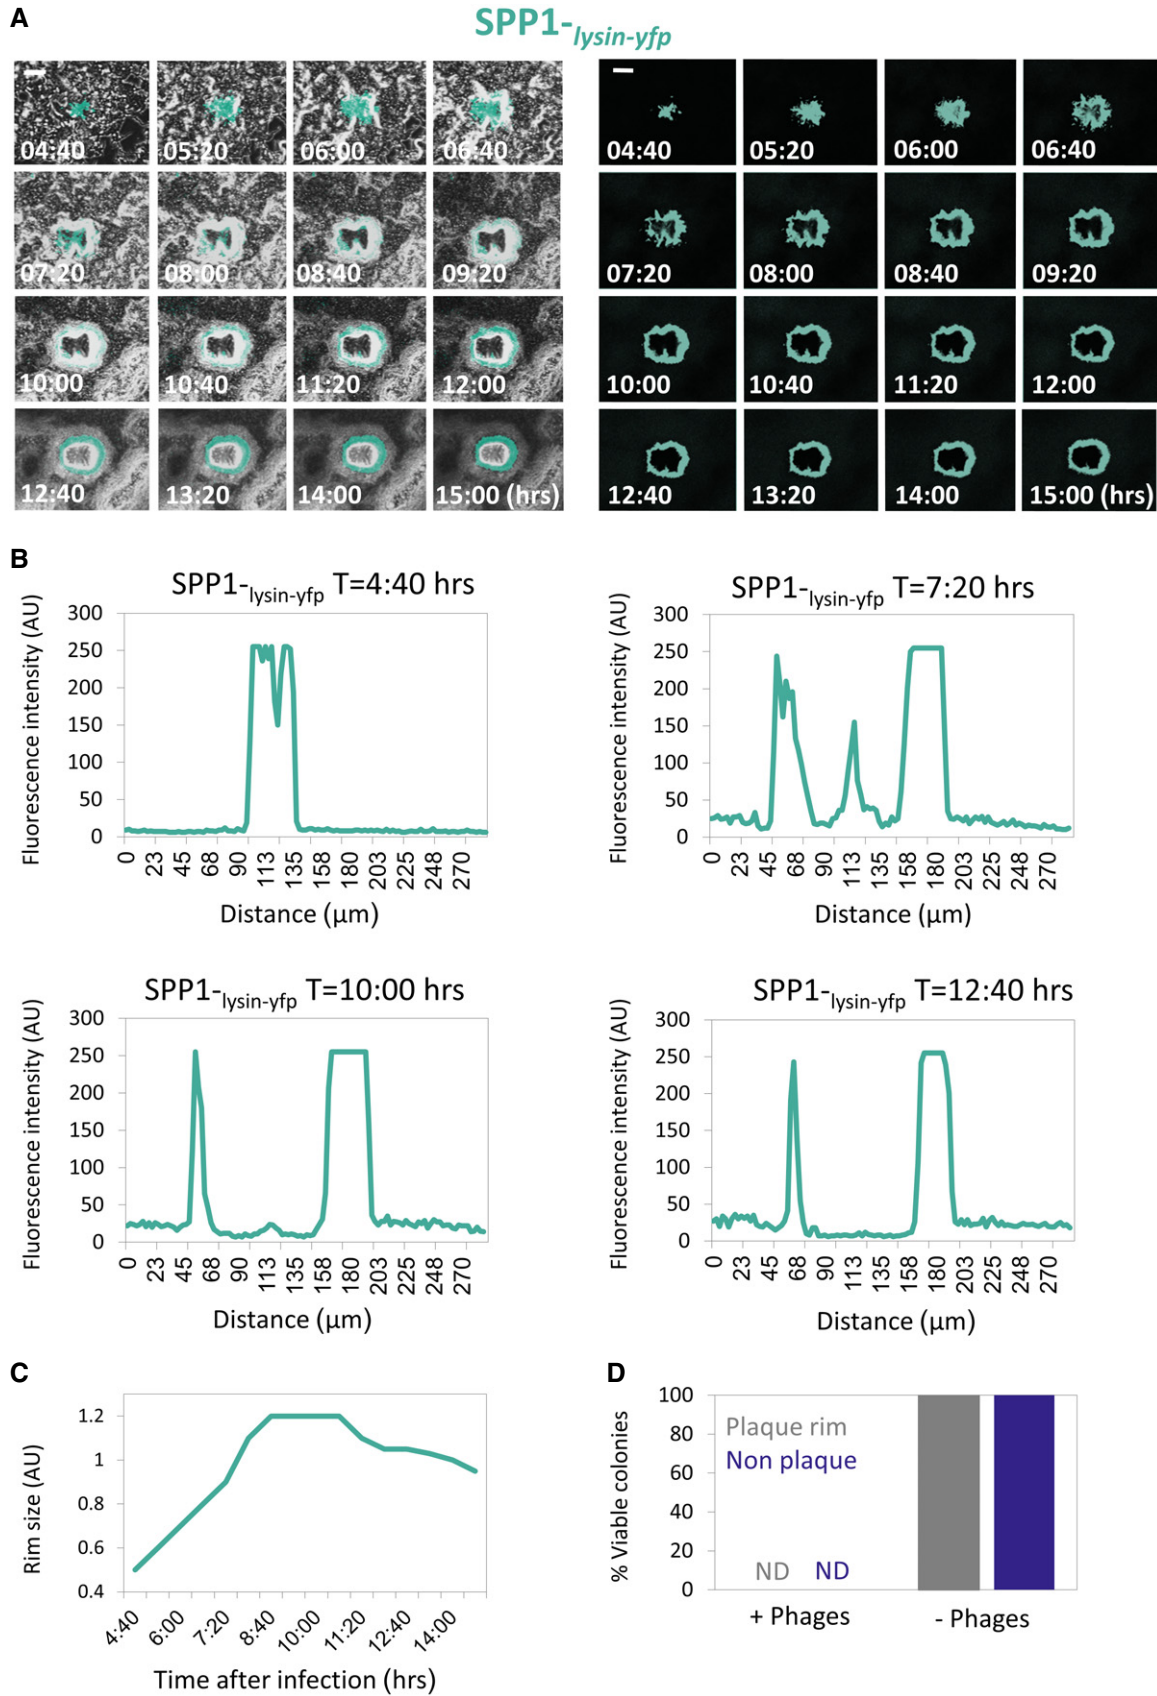

Figure EV1.

**Figure EV2.  $\Delta sigX$  cells are excluded from the plaque rim during constriction.**

- A BDR2637 ( $P_{veg}$ -*mCherry*) (WT) (purple) cells were mixed with AR16 ( $P_{rrnE}$ -*gfp*) (WT) (cyan) (1) or with ET191 ( $\Delta sigX$ ,  $P_{rrnE}$ -*gfp*) (cyan) (2-5) cells. The mixtures were infected with low concentrations ( $10^{-8}$  PFU/ml) of SPP1, placed on an agarose pad, and plaque formation was followed by time-lapse confocal microscopy. Shown are overlay images of mCherry (purple) and GFP (cyan) signals captured 16 h postinfection. (1-3) show plaque regions, whereas (4-5) show regions remote from any visible plaque site. Scale bar, 100  $\mu$ m.
- B Quantification of images 1, 3, and 4 presented in EV2A. Fluorescence intensity (AU) of the plaques formed by phages infecting the corresponding cells is shown. Fluorescence from Z sections that include the plaque region and flanking area or control areas was measured.

Source data are available online for this figure.

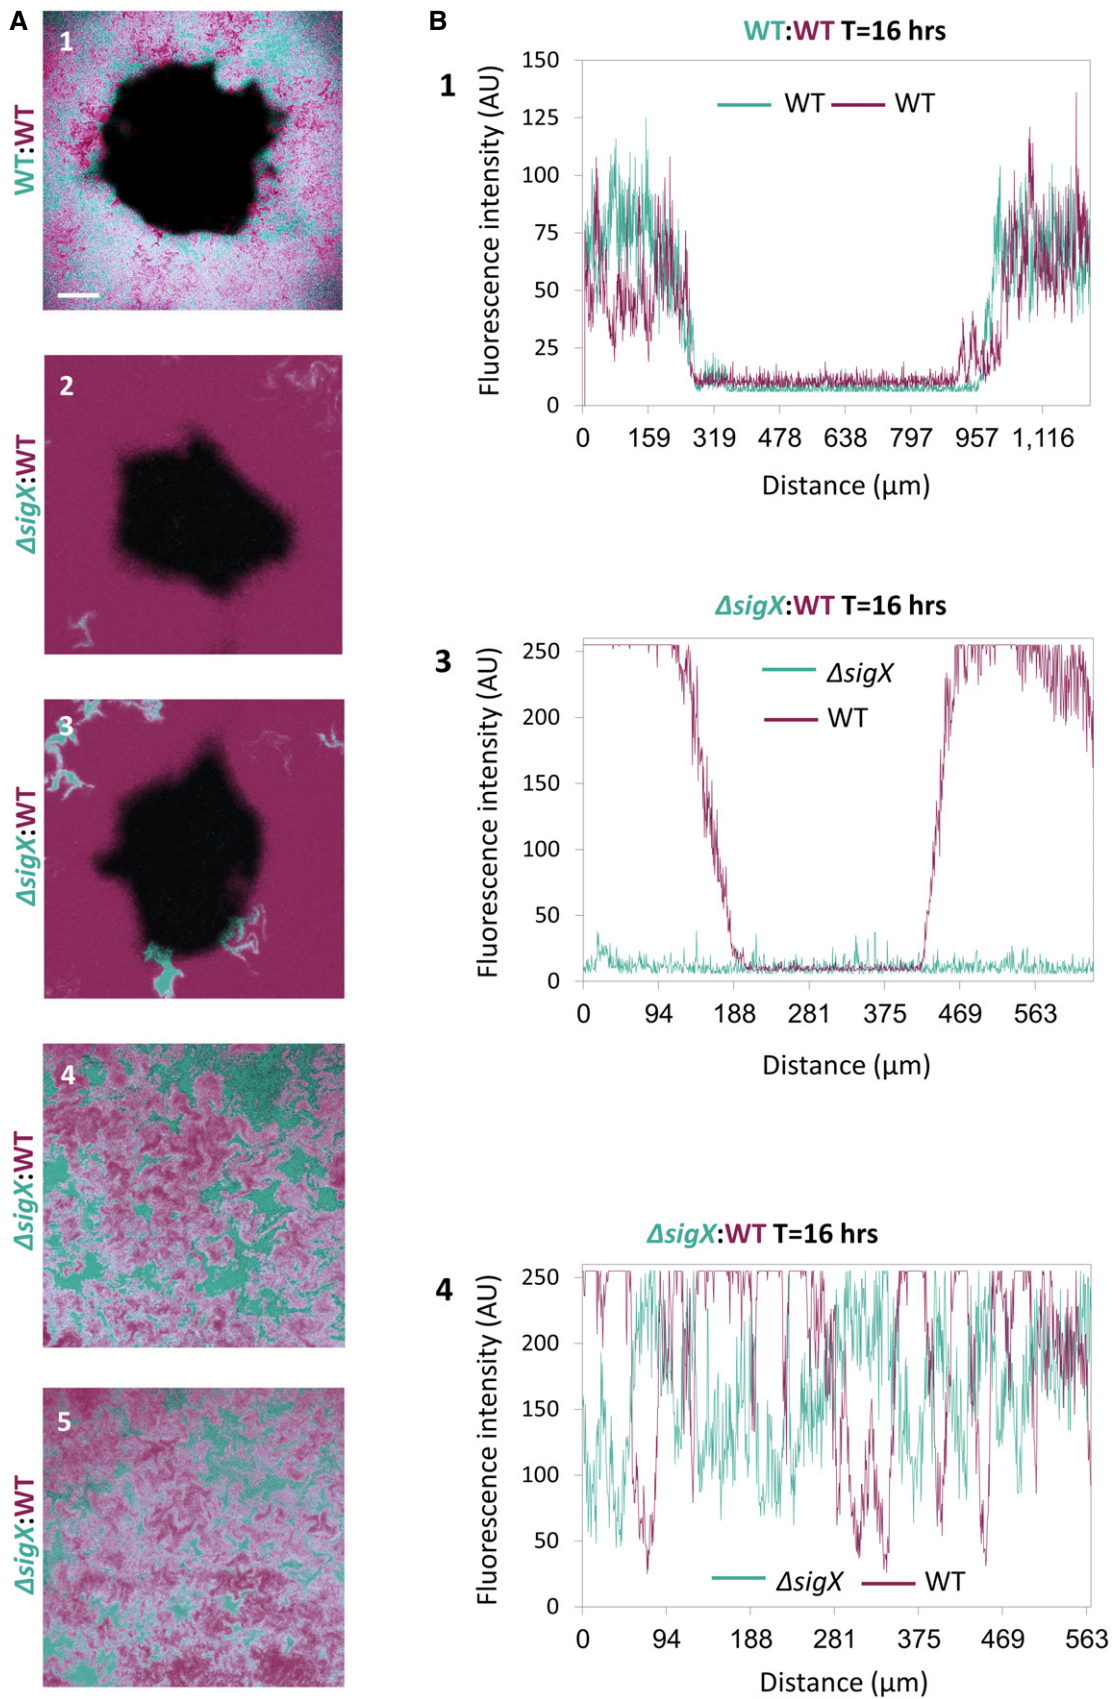

Figure EV2.

**Figure EV3. Monitoring SigX activation during phage infection.**

- A PY79 (WT) and ET19 ( $\Delta sigX$ ) cells were infected with SPP1 or Phi29 ( $10^{-6}$  PFU/ml), spread over MB agar plates, and incubated at either 37°C or 48°C. Plaque diameter was monitored after 20 h of incubation ( $n \geq 50$ ). Shown are average values and SD of 3 independent repeats.
- B PY79 (WT) and ET19 ( $\Delta sigX$ ) were grown in liquid LB medium at 48°C and  $OD_{600nm}$  monitored. Shown are average values and SD of 3 biological repeats.
- C Corresponds to the experiment presented in Fig 3A. Phage-sensitive PY79 (WT) cells were mixed with phage-resistant BS12 ( $\Delta yueB$ ,  $P_{sigX-gfp}$ ) cells and the mixture was infected with SPP1 at 2:1 (phages:bacteria) MOI, and  $OD_{600nm}$  was followed at 2.5-min intervals. Uninfected mixed population served as a control (-SPP1). Shown is a representative experiment out of 3 biological repeats, and the average values and SD of  $n \geq 3$  technical repeats.
- D BS12 ( $P_{sigX-gfp}$ ,  $\Delta yueB$ ) cells were infected with SPP1 at 2:1 (phages:bacteria) MOI, and fluorescence intensity from  $P_{sigX-gfp}$  (AU) was followed at 2.5-min intervals. Uninfected BS4 ( $P_{sigX-gfp}$ ) cells served as a control. Shown is a representative experiment out of 3 biological repeats, and the average values and SD of 3 technical repeats.
- E ET26 ( $P_{sigX-sigX-gfp}$ ) cells were infected with SPP1 at 5:1 (phages:bacteria) MOI, placed on an agarose pad, and followed by time-lapse fluorescence microscopy. Shown are signal from SigX-GFP (upper panels), and corresponding phase contrast images (lower panels), captured at the indicated time points postinfection. Scale bar, 1  $\mu m$ .

Source data are available online for this figure.

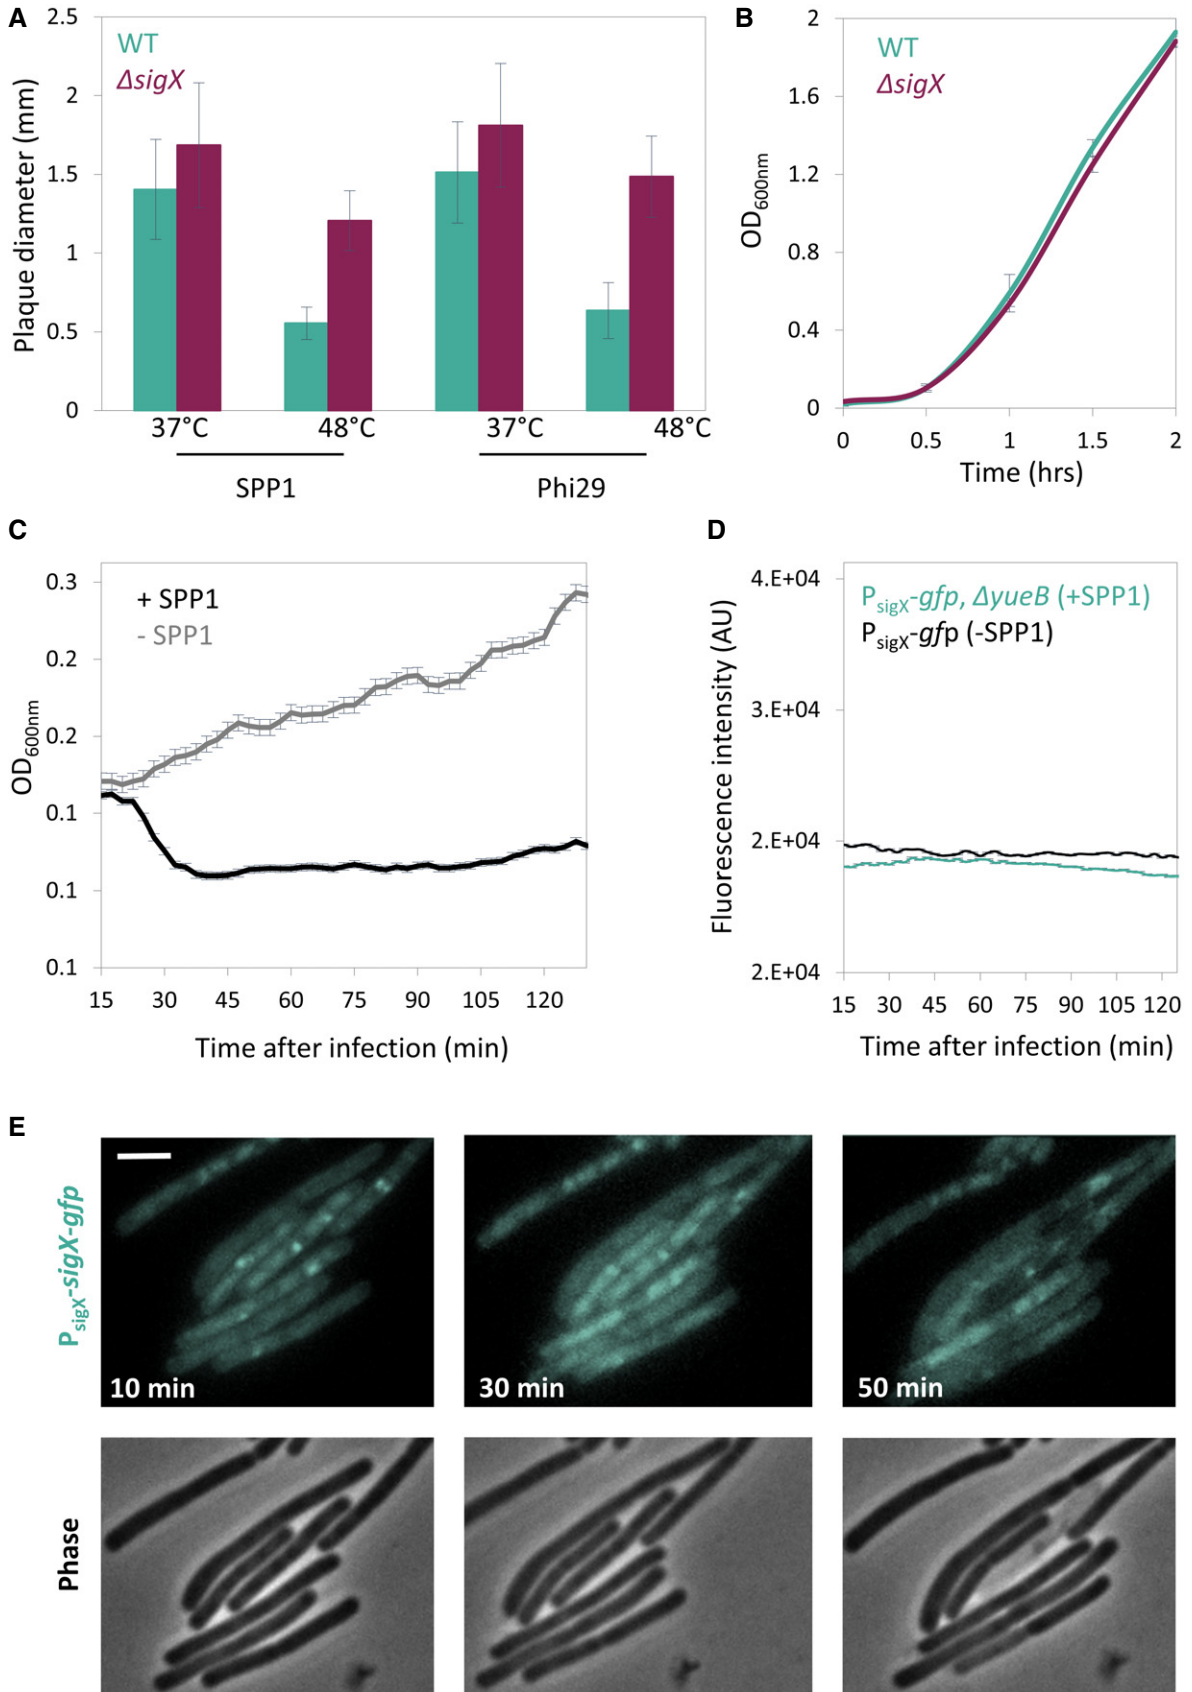

Figure EV3.



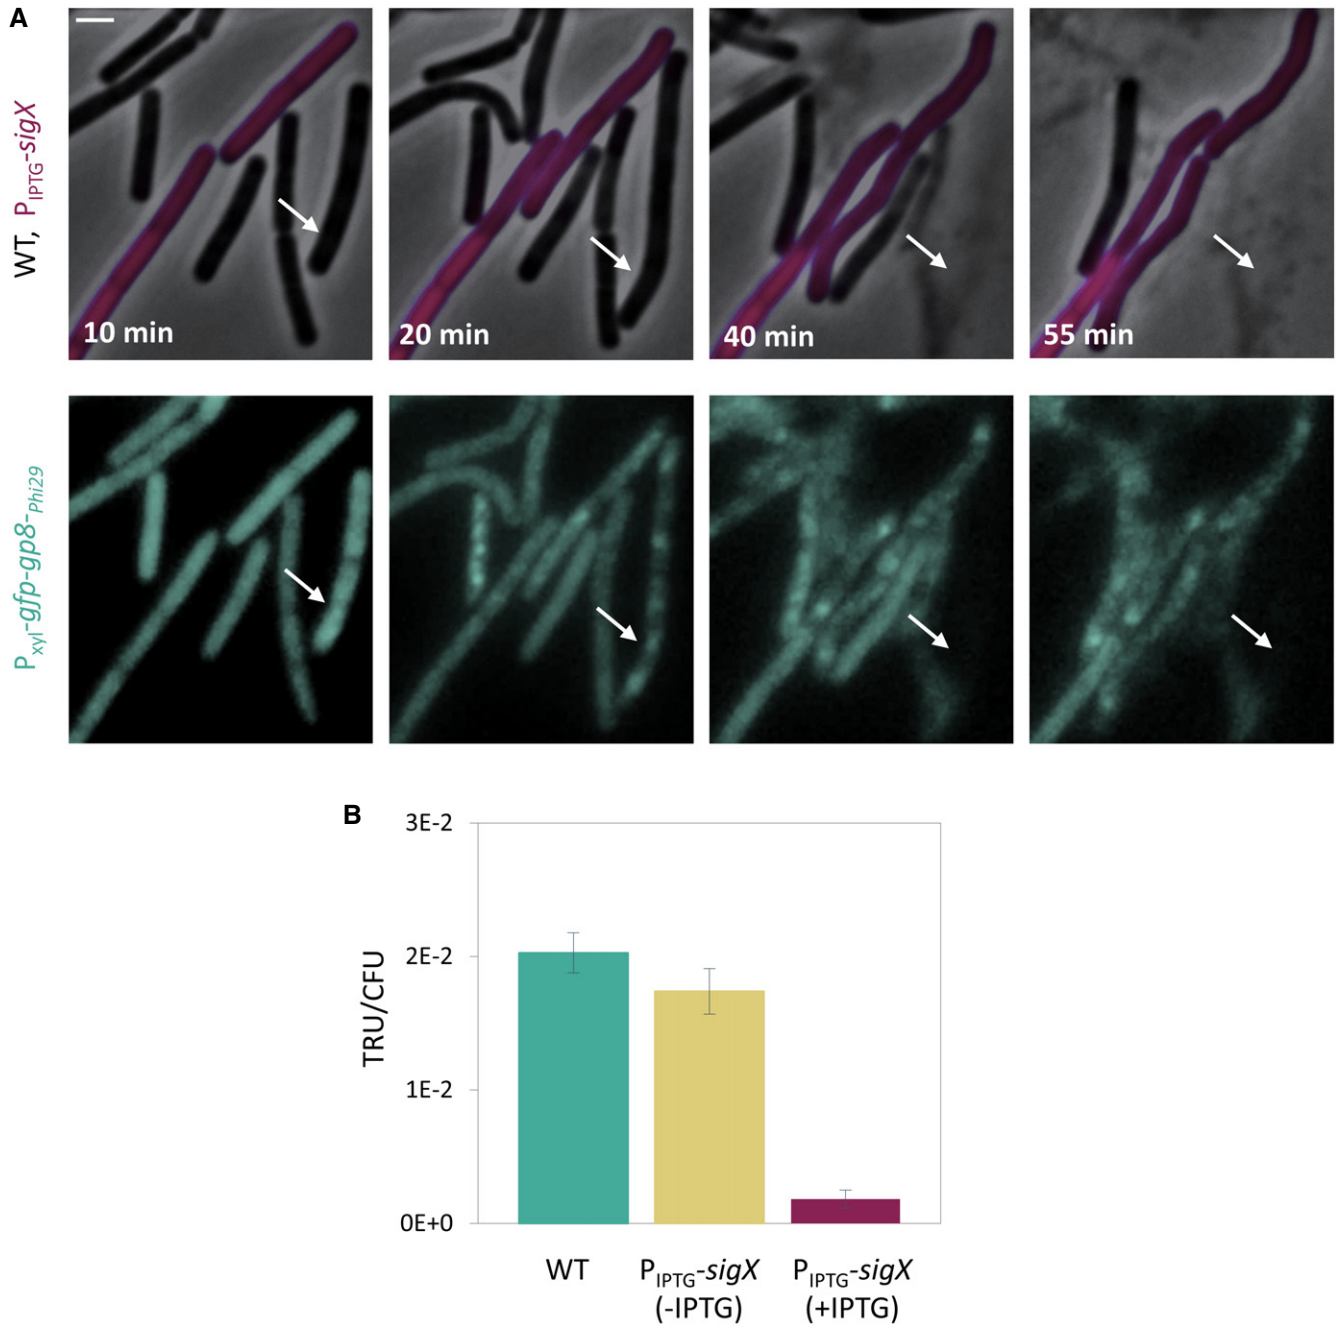

**Figure EV4. SigX over-expression interferes with phage infection.**

A ET9 ( $P_{Xyl}\text{-gfp-gp8-}\Phi_{hi29}$ ) (WT) and ET44 ( $P_{veg}\text{-mCherry}$ ,  $P_{IPTG}\text{-sigX}$ ,  $P_{Xyl}\text{-gfp-gp8-}\Phi_{hi29}$ ) ( $P_{IPTG}\text{-sigX}$ , purple) cells were grown in the presence of IPTG and xylose, mixed, and infected with Phi29 at 5:1 (phages:bacteria) MOI. The mixture was placed on an IPTG and xylose-containing agarose pad and followed by time-lapse fluorescence microscopy. Gp8- $\Phi_{hi29}$  is the major Phi29 capsid protein that localizes into discrete foci during Phi29 infection (Tzipilevich *et al.*, 2017). Shown are overlay images of phase contrast (gray) and signal from mCherry (purple) (upper panels), and signal from GFP-Gp8- $\Phi_{hi29}$  (cyan) (lower panels), captured at the indicated time points. Arrows highlight GFP-Gp8- $\Phi_{hi29}$  foci appearance in ET9 cells. Scale bar, 1  $\mu\text{m}$ .

B PY79 (WT) and ET28 ( $P_{IPTG}\text{-sigX}$ ), grown in the presence or absence of IPTG, were transduced with SPP1-pBT163 lysate, and the number of transductants was monitored by plating the cells on corresponding selective plates. Transduction unit (TRU) was calculated as the number of transductant colonies /total CFU. Shown are average values and SD of 3 biological replicates.

Source data are available online for this figure.

**Figure EV5. SigX impact on phage tolerance is Dlt-mediated.**

- A Bacterial strains harboring  $P_{IPTG}$ -*sigX* as well as the indicated gene deletions were grown in the presence of IPTG. At  $t = 60$  min, cells were infected with SPP1 at low (phages:bacteria 1:20) MOI, and  $OD_{600nm}$  was followed at 2-min intervals. PY79 (WT) was infected in parallel for comparison. Knockout of *ywbO* and the *dlt* operon (*ΔdltA*) largely abolished the tolerance to phage infection conferred by SigX over-expression. Shown is a representative experiment out of 3 independent biological repeats, with average values and SD of 3 technical repeats.
- B ET42 (*ΔdltA*,  $P_{IPTG}$ -*sigX*) cells were grown in the presence of IPTG and mixed with BDR2637 ( $P_{veg}$ -*mCherry*) (WT, purple) cells. The mixture was infected with SPP1- $lys$ -*yfp* at 5:1 (phages:bacteria) MOI, placed on an IPTG-containing agarose pad, and followed by time-lapse fluorescence microscopy. Shown are overlay images of phase contrast (gray) and signal from mCherry-labeled cells (purple) (upper panels), and the corresponding signal from Lysin- $SPP1$ -YFP (green) (lower panels), captured at the indicated time points. Yellow arrows denote infected WT cells, whereas white arrows highlight infected ET42 cells that lysed rapidly. Scale bar, 1  $\mu$ m.
- C PY79 (WT), ET41 (*ΔdltA*), and ET72 ( $P_{xyI}$ -*dltABCD*) cells, grown with or without xylose as indicated, were infected with SPP1 at low (1:20) MOI, and  $OD_{600nm}$  was followed at 2-min intervals. Shown is a representative experiment out of 2 biological repeats, and the average values and SD of 4 technical repeats.
- D PY79 (WT) and ET41 (*ΔdltA*) cells were grown in LB liquid medium, and  $OD_{600nm}$  was followed. Shown are average values and SD of 3 biological repeats.

Source data are available online for this figure.



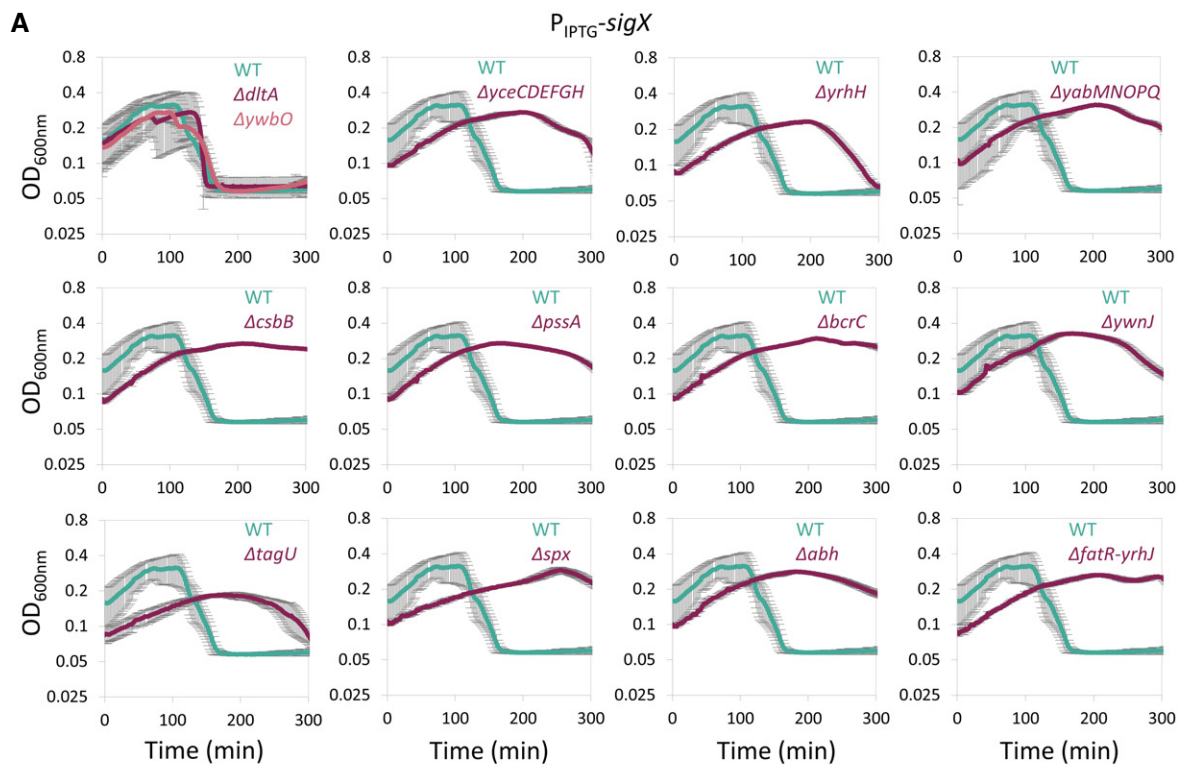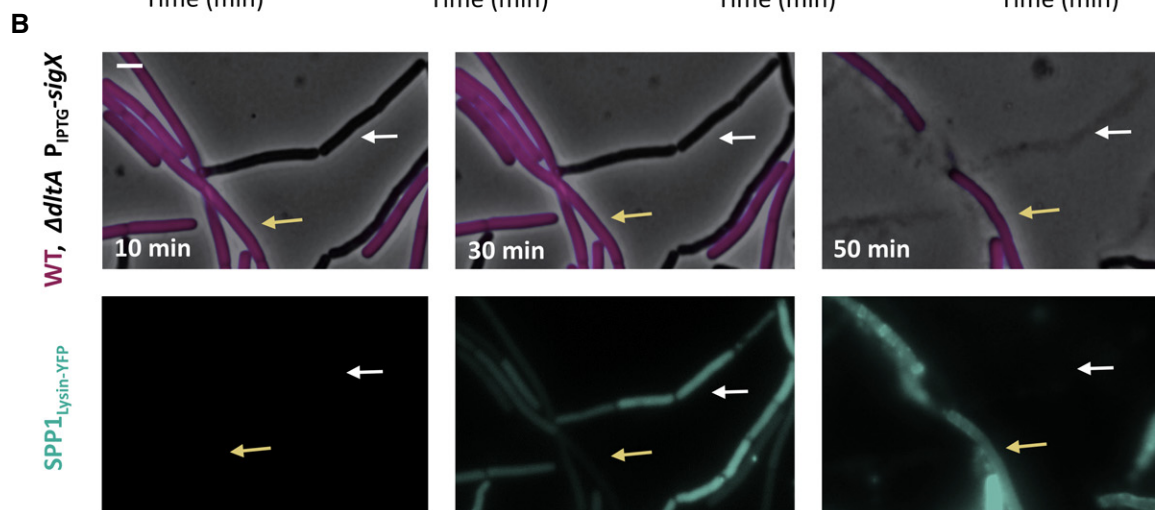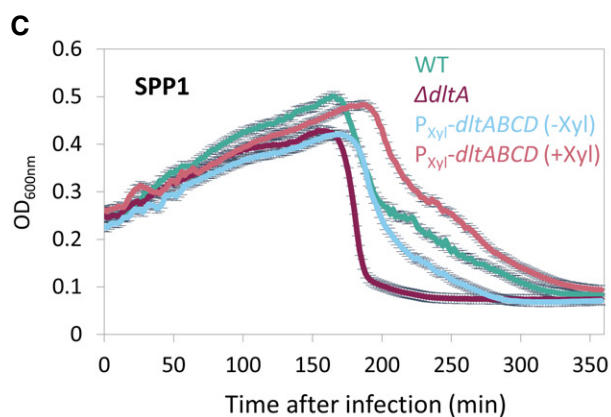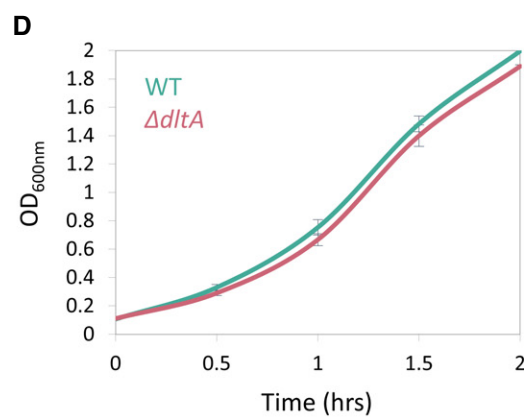

Figure EV5.
