# Supplementary material
Source: PubMed Central journal article supplement (PMC8804946)
Supplement: EMBJ-41-e109247-s010.pdf [file EMBJ-41-e109247-s010.pdf]

## APPENDIX

### **Bacteria elicit a phage tolerance response subsequent to infection of their neighbors**

Elhanan Tzipilevich<sup>1,2\*</sup>, Osher Pollak-Fiyaksel<sup>1\*</sup>, Bushraa Shraiteh<sup>1</sup>, Sigal Ben-Yehuda<sup>1,3</sup>

<sup>1</sup>Department of Microbiology and Molecular Genetics  
Institute for Medical Research Israel-Canada (IMRIC)  
The Hebrew University-Hadassah Medical School, POB 12272  
The Hebrew University of Jerusalem, 91120  
Jerusalem, Israel.

<sup>2</sup> Current address: Department of Biology and Howard Hughes Medical Institute, Duke University, Durham, North Carolina, USA

<sup>3</sup>To whom correspondence should be addressed. E-mail: [sigalb@ekmd.huji.ac.il](mailto:sigalb@ekmd.huji.ac.il) (S. B-Y)

\* These authors contributed equally to this work

### **TABLE OF CONTENT**

**Appendix Figures S1.**  $\Delta sigX$  cells are highly sensitive to infection

**Appendix Figures S2.** SigX is activated in response to phage infection

**Appendix Figures S3.** Efficient plaque constriction requires DltA

**Appendix Table S1.** List of bacterial strains and phages used in this study

**Appendix Table S2.** List of primers used in this study

# Supplementary Figures

## Appendix Figure S1

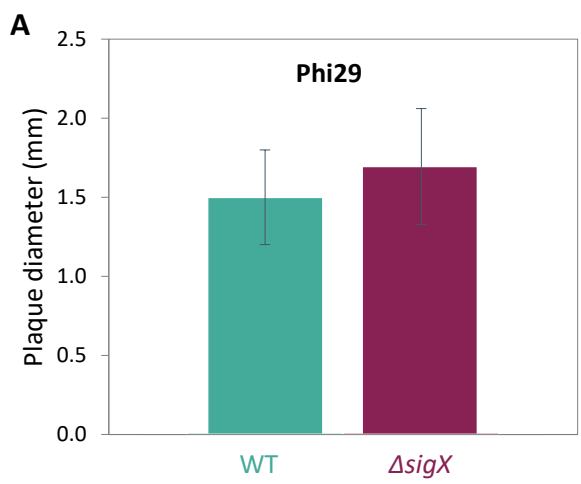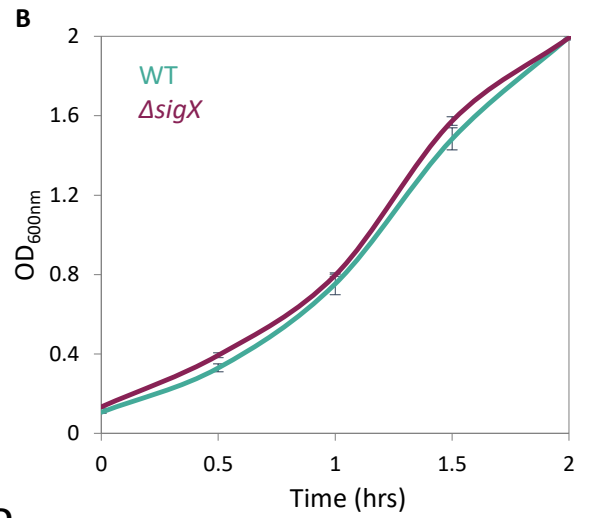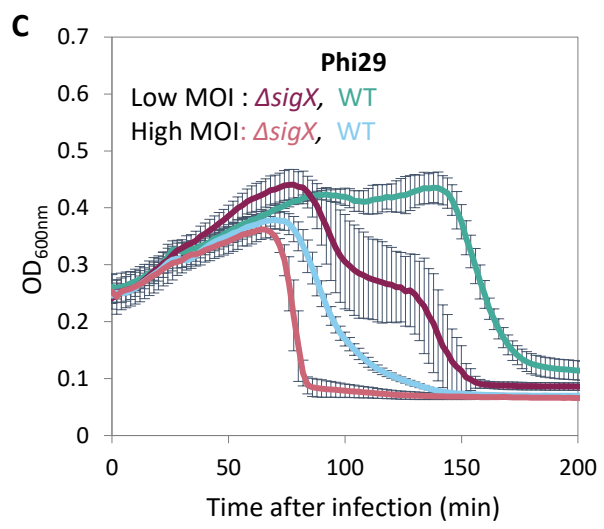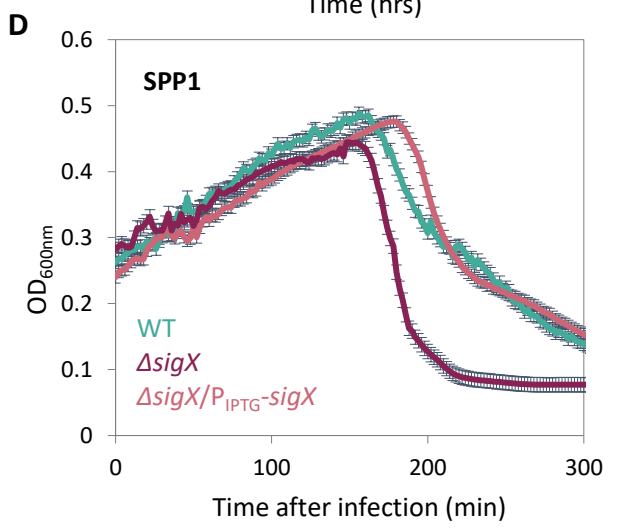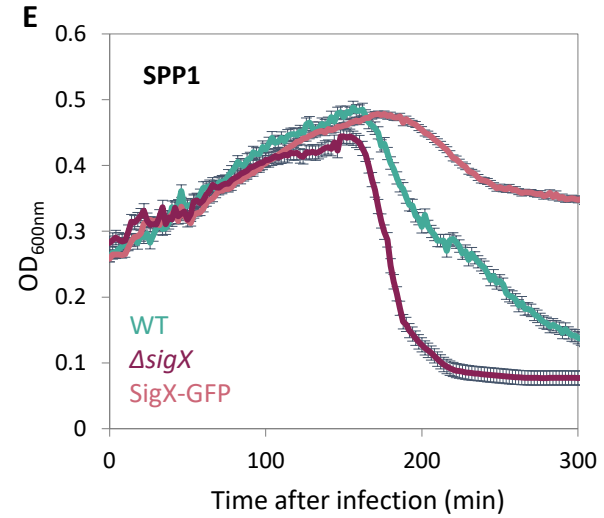

**Appendix Figure S1.  $\Delta sigX$  cells are highly sensitive to infection**

(A) PY79 (WT) and ET19 ( $\Delta sigX$ ) cells were infected with Phi29 ( $10^{-6}$  PFU/ml), spread over MB agar plates, and plaque diameter was monitored after 20 hrs of incubation. Shown is plaque diameter distribution for each strain ( $n \geq 120$ ).

(B) PY79 (WT) and ET19 ( $\Delta sigX$ ) strains were grown in LB liquid medium and  $OD_{600nm}$  monitored. Shown are average values and SD of 3 biological repeats.

(C) PY79 (WT) and ET19 ( $\Delta sigX$ ) cells were infected with Phi29 at either high (phages:bacteria 1:1) or low (phages:bacteria 1:20) MOI, and  $OD_{600nm}$  was followed at 5 min intervals. Shown is a representative experiment out of 3 biological repeats, and average values and SD of 6 technical repeats.

(D) PY79 (WT), ET19 ( $\Delta sigX$ ) and OF211 ( $\Delta sigX$ ,  $P_{IPTG-sigX}$ ) cells were infected with SPP1 at low (phages:bacteria 1:20) MOI, and  $OD_{600nm}$  was followed at 2 min intervals. Complementation was apparent even without IPTG addition, due to low promoter activity. Shown is a representative experiment out of 2 biological repeats, and the average values and SD of 3 technical repeats.

(E) PY79 (WT), ET19 ( $\Delta sigX$ ) and ET26 ( $P_{sigX-sigX-gfp}$ ) cells were infected with SPP1 at low (phages:bacteria 1:20) MOI, and  $OD_{600nm}$  was followed at 2 min intervals. SigX-GFP is functional and appears more stable than the native protein as in provides higher phage tolerance in comparison to the WT. Shown is a representative experiment out of 2 biological repeats, and the average values and SD of 3 technical repeats.

## Appendix Figure S2

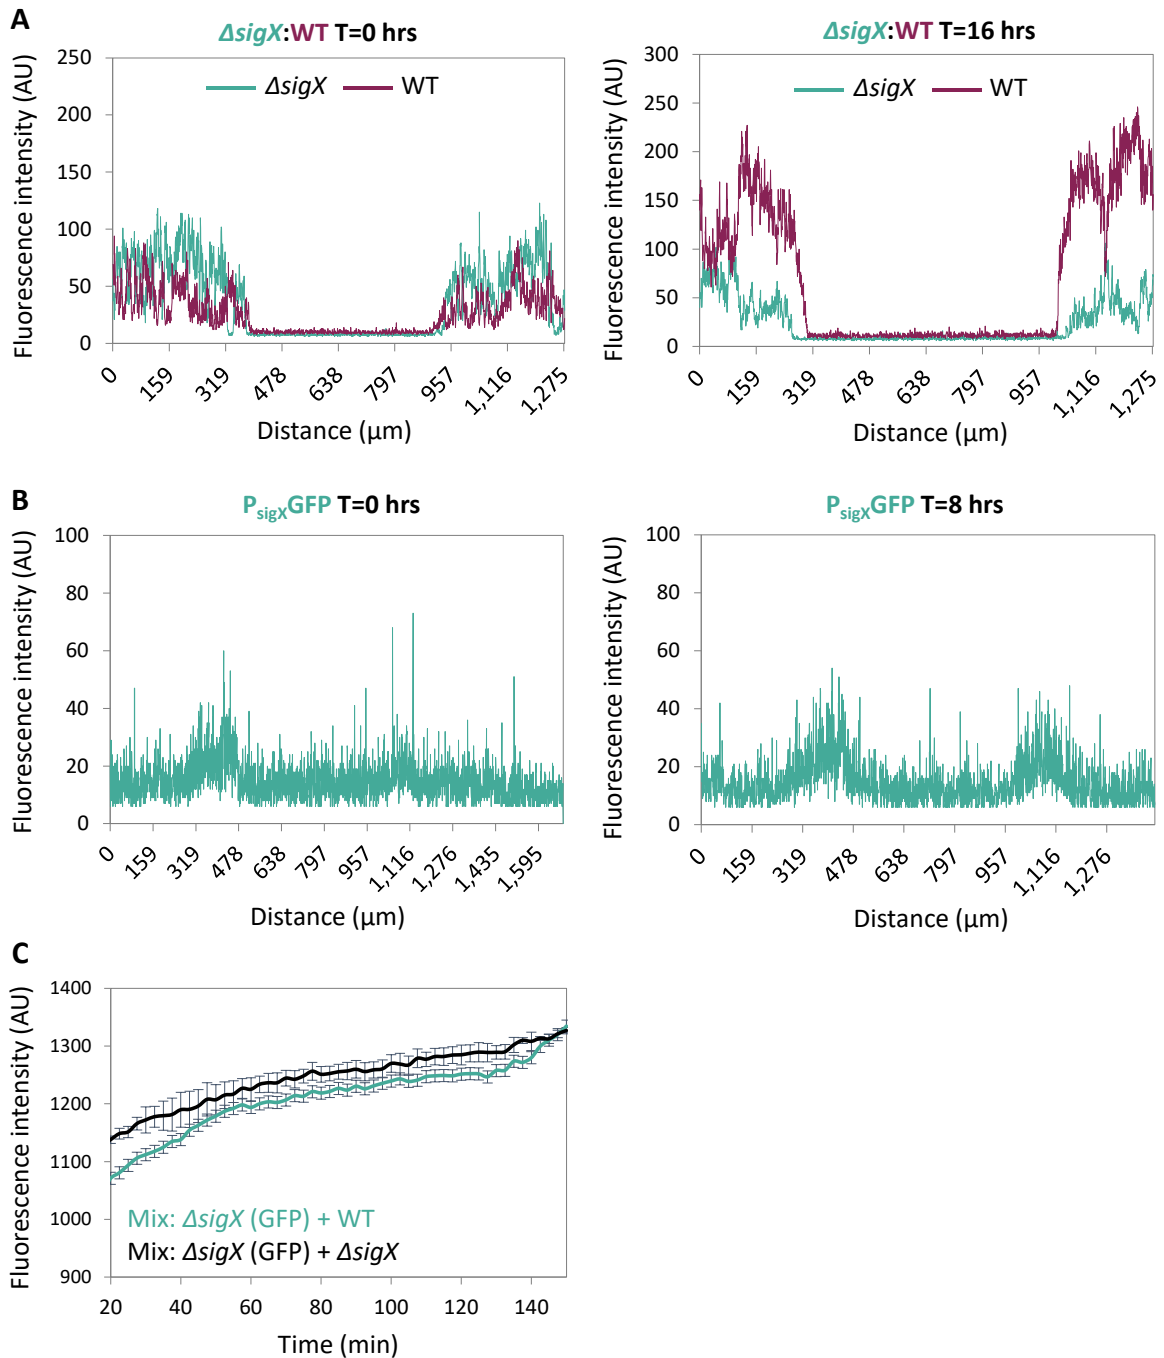

### Figure S2. SigX is activated in response to phage infection

(A) Quantification of the images presented in Fig 2E at the indicated time points. Fluorescence intensity (AU) of the plaque formed by phages infecting a mixture of BDR2637 ( $P_{veg}$ -*mCherry*) (WT, purple) and ET191 ( $P_{rimE}$ -*gfp*, *ΔsigX*) (*ΔsigX*, cyan) cells. Fluorescence from Z sections that include the plaque region and flanking area was measured.

**(B)** Quantification of the images presented in Fig 2F at the indicated time points. Fluorescence intensity (AU) of the plaque formed by phages infecting ET27 ( $P_{sigX-gfp}$ ) cells. Fluorescence from Z sections that include the plaque region and flanking area was measured.

**(C)** ET191 ( $P_{rmE-gfp}$ ,  $\Delta sigX$ ) cells were mixed with PY79 (WT) or with ET19 ( $\Delta sigX$ ), and fluorescence intensity from  $P_{rmE-gfp}$  (AU) was followed at 2.5 min intervals. Shown is a representative experiment out of 3 biological repeats, and the average values and SD of 3 technical repeats.

## Appendix Figure S3

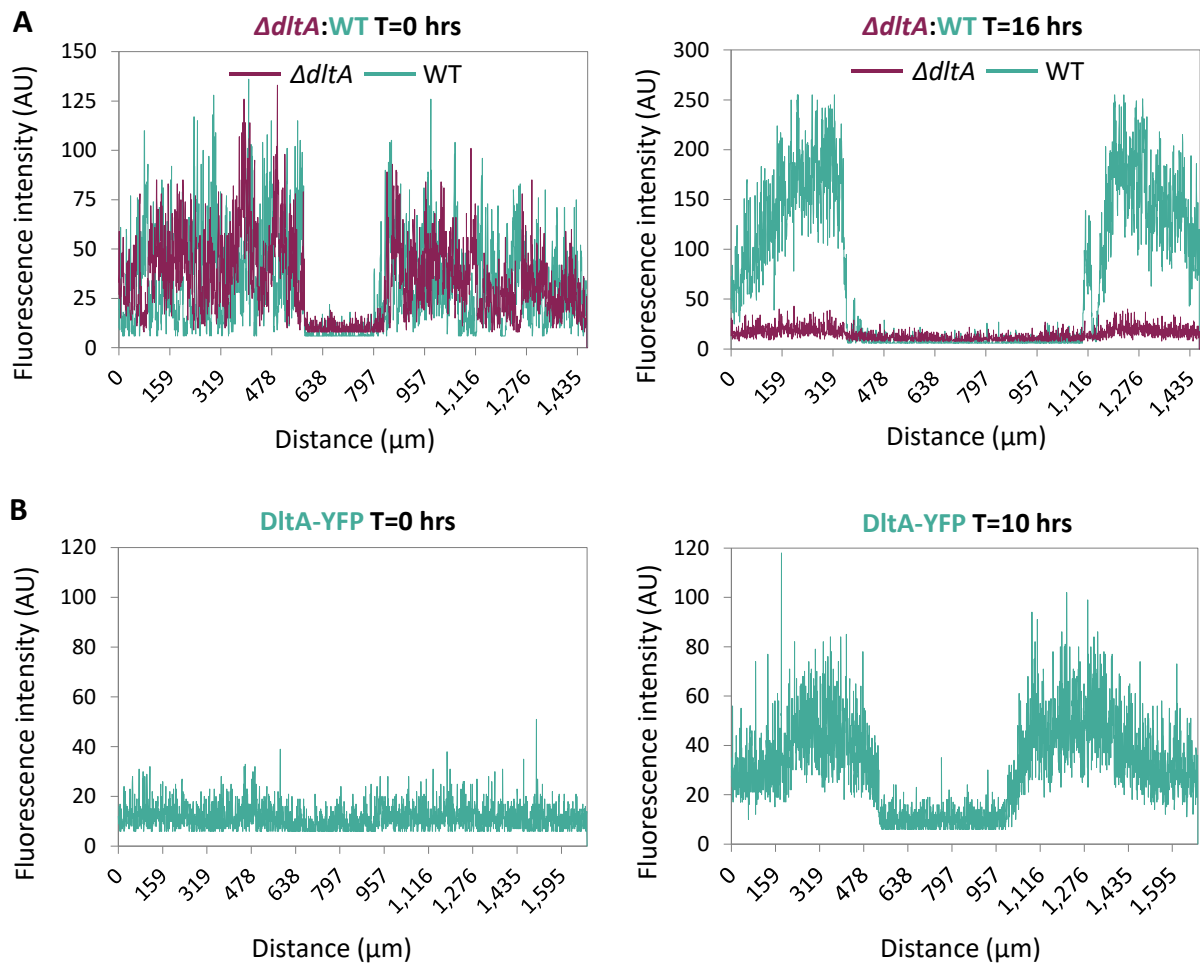

### Appendix Figure S3. Efficient plaque constriction requires DltA

(A) Quantification of the images presented in Fig 5F at the indicated time points. Fluorescence intensity (AU) of the plaque formed by phages infecting a mixture of AR16 ( $P_{tmE-gfp}$ ) (WT, cyan) and ET411 ( $P_{veg-mCherry}, \Delta dltA$ ) ( $\Delta dltA$ , purple) cells. Fluorescence from Z sections that include the plaque region and flanking area was measured.

(B) Quantification of the images presented in Fig 5G at the indicated time points. Fluorescence intensity (AU) of the plaque formed by phages infecting ET43 ( $dltA-yfp$ ) cells. Fluorescence from Z sections that include the plaque region and surrounding area was measured.

**Appendix Table S1. List of bacterial strains and phages used in this study**

| Strain Name    | Genotype                                     | Source                                                                                                                                                                                                                                                                                                                         |
|----------------|----------------------------------------------|--------------------------------------------------------------------------------------------------------------------------------------------------------------------------------------------------------------------------------------------------------------------------------------------------------------------------------|
| <i>E. coli</i> |                                              |                                                                                                                                                                                                                                                                                                                                |
| pET2           | <i>amyE::promoter less gfp-cm</i>            | Constructed by amplifying the <i>gfpmut2</i> gene from pKL147 (Lemon & Grossman, 1998), by PCR using primers <i>BamHI-NotI-gfp-U</i> and <i>gfp-EcoRI-L</i> . The PCR-amplified DNA was digested with <i>BamHI</i> and <i>EcoRI</i> and was cloned into pDG364 (BGSC) digested with the same enzymes.                          |
| pET26          | <i>amyE::P<sub>sigX</sub>-sigX-gfp-cm</i>    | Constructed by amplifying the <i>sigX</i> ORF with 200 bp upstream of the start codon from gDNA of <i>B. subtilis</i> strain (PY79), using primers <i>PsigX-U-BamHI</i> and <i>sigX-L-NotI</i> . The PCR-amplified DNA was digested with <i>BamHI</i> and <i>NotI</i> and was cloned into pET2 digested with the same enzymes. |
| pET27          | <i>amyE::P<sub>sigX</sub>-gfp-cm</i>         | Constructed by amplifying 200 bp upstream of the start codon of <i>sigX</i> from gDNA of <i>B. subtilis</i> strain (PY79), using primers <i>PsigX-U-BamHI</i> and <i>PsigX-L-NotI</i> . The PCR-amplified DNA was digested with <i>BamHI</i> and <i>NotI</i> and was cloned into pET2 digested with the same enzymes.          |
| pET28          | <i>amyE::P<sub>hyper-pank</sub>-sigX-spc</i> | Constructed by amplifying the <i>sigX</i> from gDNA of <i>B. subtilis</i> strain (PY79), using primers <i>sigX-U-SalI</i> and <i>sigX-L-NheI</i> . The PCR-amplified DNA was digested with <i>SalI</i> and <i>NheI</i> and was cloned into pDR111 digested with the same enzymes.                                              |
| pET29          | <i>thrC::P<sub>hyper-pank</sub>-sigX-mls</i> | Constructed by amplifying the <i>sigX</i> from gDNA of <i>B. subtilis</i> strain (PY79), using primers <i>sigX-U-SalI</i> and <i>sigX-L-NheI</i> . The PCR-amplified DNA was digested with <i>SalI</i> and <i>NheI</i> and was cloned into pDG1743 digested with the same enzymes.                                             |
| pET43          | <i>dltA::dltA-yfp-spc</i>                    | Constructed by amplifying the <i>C-terminus</i> of <i>dltA</i> from gDNA of <i>B. subtilis</i> strain (PY79), using primers <i>dltA-MfeI-U</i> and <i>dltA-XhoI-L</i> . The PCR-amplified DNA was digested with <i>MfeI</i> and <i>XhoI</i> and was cloned into pKL147 digested with <i>EcoRI</i> and <i>XhoI</i>              |
| pET72          | <i>amyE::P<sub>xyI</sub>-dltABCDE-spc</i>    | Constructed by amplifying the <i>dlt</i> operon from gDNA of <i>B. subtilis</i> strain (PY79), using primers <i>dltA-U-SalI</i> and <i>dltE-L-NheI</i> . The PCR-amplified DNA was digested with <i>SalI</i> and <i>NheI</i> and was cloned into pDR160 digested with the same enzymes.                                        |

|                    |                                                                    |                                                                                                                                                 |
|--------------------|--------------------------------------------------------------------|-------------------------------------------------------------------------------------------------------------------------------------------------|
| <i>B. subtilis</i> |                                                                    |                                                                                                                                                 |
| PY79               | <i>B. subtilis</i>                                                 | Wild type (Youngman et al., 1984).                                                                                                              |
| AR16               | <i>amyE::P<sub>rmE</sub>-gfp-spc</i>                               | Lab stock (Rosenberg et al., 2012).                                                                                                             |
| BDR2637            | <i>sacA::P<sub>veg</sub>-mCherry-phleo</i>                         | Kindly provided by Prof. David Rudner (Harvard university)                                                                                      |
| BS1                | <i>thrC::P<sub>hyper-spank</sub>-sigX-mls</i>                      | Constructed by transforming gDNA from ET29 into PY79.                                                                                           |
| BS4                | <i>amyE::P<sub>sigX</sub>-gfp-cm</i>                               | Constructed by transforming the gDNA of ET27 into PY79.                                                                                         |
| BS12               | <i>amyE::P<sub>sigX</sub>-gfp-cm</i><br><i>ΔyueB::tet</i>          | Constructed by transforming the gDNA of BS4 into ET6.                                                                                           |
| OF83               | <i>thrC::P<sub>pen</sub>-lacIΔ11-cfp-mls</i>                       | Constructed by transforming gDNA from GSY1000 (Jakutyte et al., 2011) (Kindly provided by Prof. Paulo Tavares, CNRS, Gif-sur-Yvette) into PY79. |
| OF132              | <i>Δspx::cm</i>                                                    | Constructed using Gibson assembly kit (NEB, USA) utilizing primers <i>spx::cm</i> -P1-P4 and transforming into PY79.                            |
| OF211              | <i>ΔsigX::kan</i><br><i>amyE::P<sub>hyper-spank</sub>-sigX-spc</i> | Constructed by transforming gDNA from ET19 into OF28.                                                                                           |
| ET9                | <i>amyE::P<sub>xyl</sub>-gfp-gp8(phi29)-cm</i>                     | Lab stock (Tzipilevich et al., 2017).                                                                                                           |
| ET18               | <i>ΔsigW::kan</i>                                                  | Constructed using Gibson assembly kit (NEB, USA) utilizing primers <i>sigW::kan</i> -P1-P4 and transforming into PY79.                          |
| ET19               | <i>ΔsigX::kan</i>                                                  | Constructed using Gibson assembly kit (NEB, USA) utilizing primers <i>sigX::kan</i> -P1-P4 and transforming into PY79.                          |
| ET20               | <i>ΔsigY::mls</i>                                                  | Constructed by transforming gDNA from HB10108 (Mascher et al., 2007) (Kindly provided by Prof. John Helmann, Cornell University) into PY79.     |
| ET21               | <i>ΔsigZ::kan</i>                                                  | Constructed by transforming gDNA from HB10109 (Mascher et al., 2007) (Kindly provided by Prof. John Helmann, Cornell University) into PY79.     |
| ET22               | <i>ΔsigV::cm</i><br><i>sacA::P<sub>veg</sub>-mCherry-phleo</i>     | Constructed using Gibson assembly kit (NEB, USA) utilizing primers <i>sigV::cm</i> -P1-P4 and transforming into BDR2637.                        |
| ET23               | <i>ΔsigM::kan</i><br><i>sacA::P<sub>veg</sub>-mCherry-phleo</i>    | Constructed using Gibson assembly kit (NEB, USA) utilizing primers <i>sigM::kan</i> -P1-P4 and transforming into BDR2637.                       |



|      |                                                                                                                                                            |                                                                                                                                             |
|------|------------------------------------------------------------------------------------------------------------------------------------------------------------|---------------------------------------------------------------------------------------------------------------------------------------------|
| ET24 | <i>ΔylaC::spec</i>                                                                                                                                         | Constructed by transforming gDNA from HB10233 (Mascher et al., 2007) (Kindly provided by Prof. John Helmann, Cornell University) into PY79. |
| ET26 | <i>amyE::P<sub>sigX</sub>-sigX-gfp-cm</i>                                                                                                                  | Constructed by transforming pET26 into PY79.                                                                                                |
| ET27 | <i>amyE::P<sub>sigX</sub>-gfp-cm,</i><br><i>sacA::P<sub>veg</sub>-mCherry-phleo</i>                                                                        | Constructed by transforming pET27 into BDR2637.                                                                                             |
| ET28 | <i>amyE::P<sub>hyper-spank</sub>-sigX-spc</i>                                                                                                              | Constructed by transforming pET28 into PY79.                                                                                                |
| ET29 | <i>thrC::P<sub>hyper-spank</sub>-sigX-mls</i><br><i>sacA::P<sub>veg</sub>-mCherry-phleo</i>                                                                | Constructed by transforming pET29 into BDR2637.                                                                                             |
| ET40 | <i>thrC::P<sub>pen-lacIΔ11</sub>-cfp-</i><br><i>mls,</i><br><i>amyE::P<sub>hyper-spank</sub>-sigX-spc</i>                                                  | Constructed by transforming gDNA from ET28 into OF83.                                                                                       |
| ET41 | <i>ΔdltA::cm</i>                                                                                                                                           | Constructed using Gibson assembly kit (NEB, USA) utilizing primers <i>dltA::cm</i> -P1-P4 and transforming into PY79.                       |
| ET42 | <i>ΔdltA::cm,</i><br><i>amyE::P<sub>hyper-spank</sub>-sigX-</i><br><i>spc.</i>                                                                             | Constructed by transforming gDNA from ET41 into ET28.                                                                                       |
| ET43 | <i>dltA::dltA-yfp-spc,</i><br><i>sacA::P<sub>veg</sub>-mCherry-phleo</i>                                                                                   | Constructed by transforming pET43 into BDR2637.                                                                                             |
| ET44 | <i>amyE::P<sub>xyl</sub>-gfp-</i><br><i>gp8(phi29)-cm,</i><br><i>thrC::P<sub>hyper-spank</sub>-sigX-mls,</i><br><i>sacA::P<sub>veg</sub>-mCherry-Phleo</i> | Constructed by sequential transformation of gDNA from ET9 into ET29.                                                                        |
| ET47 | <i>yceCDEFGH::cm,</i><br><i>sacA::P<sub>veg</sub>-mCherry-phleo</i>                                                                                        | Constructed using Gibson assembly kit (NEB, USA) utilizing primers <i>yceCDEFGH::cm</i> -P1-P4 and transforming into BDR2637.               |
| ET48 | <i>yrhH::cm,</i><br><i>sacA::P<sub>veg</sub>-mCherry-phleo</i>                                                                                             | Constructed using Gibson assembly kit (NEB, USA) utilizing primers <i>yrhH::cm</i> -P1-P4 and transforming into BDR2637.                    |
| ET49 | <i>yabMNOPQ::cm.</i><br><i>sacA::P<sub>veg</sub>-mCherry-phleo</i>                                                                                         | Constructed using Gibson assembly kit (NEB, USA) utilizing primers <i>yabMNOPQ::cm</i> -P1-P4 and transforming into BDR2637.                |
| ET50 | <i>ywbO::cm,</i><br><i>sacA::P<sub>veg</sub>-mCherry-phleo</i>                                                                                             | Constructed using Gibson assembly kit (NEB, USA) utilizing primers <i>ywbO::cm</i> -P1-P4 and transforming into BDR2637.                    |
| ET52 | <i>csbB::kan</i>                                                                                                                                           | Constructed using Gibson assembly kit (NEB, USA) utilizing primers <i>csbB::kan</i> -P1-P4 and transforming into PY79.                      |
| ET53 | <i>pssA::mls</i><br><i>sacA::P<sub>veg</sub>-mCherry-Phleo</i>                                                                                             | Constructed using Gibson assembly kit (NEB, USA) utilizing primers <i>pssA::mls</i> -P1-P4, and transforming into BDR2637.                  |

|       |                                                                                                                        |                                                                                                                             |
|-------|------------------------------------------------------------------------------------------------------------------------|-----------------------------------------------------------------------------------------------------------------------------|
| ET54  | <i>bcrC::cm</i>                                                                                                        | Constructed using Gibson assembly kit (NEB, USA) utilizing primers <i>bcrC::cm</i> -P1-P4, and transforming into PY79.      |
| ET55  | <i>ywnJ::cm</i>                                                                                                        | Constructed using Gibson assembly kit (NEB, USA) utilizing primers <i>ywnJ::cm</i> -P1-P4, and transforming into PY79.      |
| ET56  | <i>tagU::cm</i>                                                                                                        | Constructed using Gibson assembly kit (NEB, USA) utilizing primers <i>tagU::mIs</i> -P1-P4, and transforming into PY79.     |
| ET58  | <i>abh::mIs</i><br><i>sacA::P<sub>veg</sub>-mCherry-Phleo</i>                                                          | Constructed using Gibson assembly kit (NEB, FUSA) utilizing primers <i>abh::mIs</i> -P1-P4 , and transforming into BDR2637. |
| ET59  | <i>fatR-yrhJ::mIs</i>                                                                                                  | Constructed using Gibson assembly kit (NEB, USA) utilizing primers <i>fatR-yrhJ::mIs</i> -P1-P4 and transforming into PY79. |
| ET191 | <i>ΔsigX::kan</i> ,<br><i>amyE::P<sub>rmE</sub>-gfp-spc</i> .                                                          | Constructed by transforming gDNA from ET19 into AR16.                                                                       |
| ET261 | <i>ΔyueB::tet</i> ,<br><i>amyE::P<sub>sigX</sub>-sigX-gfp-cm</i> .                                                     | Constructed by transforming gDNA from ET26 into ET6 (Tzipilevich et al., 2017).                                             |
| ET411 | <i>ΔdltA::cm</i> ,<br><i>sacA::P<sub>veg</sub>-mCherry-phleo</i>                                                       | Constructed by transforming gDNA from ET41 into BDR2637.                                                                    |
| ET471 | <i>yceCDEFGH::cm</i> ,<br><i>amyE::P<sub>hyper-spank</sub>-sigX-spc</i> ,                                              | Constructed using Gibson assembly kit (NEB, USA) utilizing primers <i>yceCDEFGH::cm</i> -P1-P4 and transforming into ET28.  |
| ET481 | <i>yrhH::cm</i> ,<br><i>amyE::P<sub>hyper-spank</sub>-sigX-spc</i> ,<br><i>sacA::P<sub>veg</sub>-mCherry-phleo</i>     | Constructed by transforming gDNA from ET48 into ET28.                                                                       |
| ET491 | <i>yabMNOPQ::cm</i> ,<br><i>amyE::P<sub>hyper-spank</sub>-sigX-spc</i> ,<br><i>sacA::P<sub>veg</sub>-mCherry-phleo</i> | Constructed by transforming gDNA from ET49 into ET28.                                                                       |
| ET501 | <i>ywbO::mIs</i> ,<br><i>amyE::P<sub>hyper-spank</sub>-sigX-spc</i> ,<br><i>sacA::P<sub>veg</sub>-mCherry-phleo</i>    | Constructed by transforming gDNA from ET50 into ET28.                                                                       |
| ET521 | <i>csbB::kan</i> ,<br><i>amyE::P<sub>hyper-spank</sub>-sigX-spc</i>                                                    | Constructed by transforming gDNA from ET52 into ET28.                                                                       |
| ET531 | <i>pssA::mIs</i> ,<br><i>amyE::P<sub>hyper-spank</sub>-sigX-spc</i>                                                    | Constructed by transforming gDNA from ET53 into ET28.                                                                       |
| ET541 | <i>bcrC::cm</i> ,<br><i>amyE::P<sub>hyper-spank</sub>-sigX-spc</i>                                                     | Constructed by transforming gDNA from ET54 into ET28.                                                                       |

|                            |                                                                                                                   |                                                                   |
|----------------------------|-------------------------------------------------------------------------------------------------------------------|-------------------------------------------------------------------|
| ET551                      | <i>ywnJ::cm,</i><br><i>amyE::P<sub>hyper-spank-sigX-spc</sub></i>                                                 | Constructed by transforming gDNA from ET55 into ET28.             |
| ET561                      | <i>tagU::cm,</i><br><i>amyE::P<sub>hyper-spank-sigX-spc</sub></i>                                                 | Constructed by transforming gDNA from ET56 into ET28.             |
| ET571                      | <i>spx::cm,</i><br><i>amyE::P<sub>hyper-spank-sigX-spc</sub></i>                                                  | Constructed by transforming gDNA from OF132 into ET28.            |
| ET581                      | <i>abh::mls ,</i><br><i>amyE::P<sub>hyper-spank-sigX-spc</sub>,</i><br><i>sacA::P<sub>veg-mCherry-Phleo</sub></i> | Constructed by transforming gDNA from ET58 into ET28.             |
| ET591                      | <i>fatR-yrhJ::mls,</i><br><i>amyE::P<sub>hyper-spank-sigX-spc</sub></i>                                           | Constructed by transforming gDNA from ET59 into ET28.             |
| ET72                       | <i>amyE::P<sub>xyl-dltABCDE-spc</sub></i>                                                                         | Constructed by transforming pET72 into PY79.                      |
|                            |                                                                                                                   |                                                                   |
| <b>Phages</b>              |                                                                                                                   |                                                                   |
| SPP1                       | Wild type <i>B. subtilis</i> phage                                                                                | Kindly provided by the Bacillus Genetic Stock Center, BGCID 1P7 . |
| SPP1- <i>lysin-yfp</i>     | <i>gp51::gp51-yfp</i>                                                                                             | Described previously (Tzipilevich et al., 2017).                  |
| SPP1- <i>delX110lacO64</i> | <i>delX110lacO64</i>                                                                                              | Kindly provided by Prof. Paulo Tavares (Gif-sur-Yvette, France).  |
| Phi29                      | Wild type <i>B. subtilis</i> phage                                                                                | Kindly provided by the Bacillus Genetic Stock Center, BGCID 1P19. |

**Appendix Table S2. List of primers used in this study**

| <b>Primer Name</b>   | <b>Primer Sequence (5'-3')</b>                             |
|----------------------|------------------------------------------------------------|
| <i>ΔsigW::kan-P1</i> | GCCAGTGCCTCCTATGATTTCTGCG                                  |
| <i>ΔsigW::kan-P2</i> | CTGAGCGAGGGAGCAGAAATTTATCTAACCTCTGCCTTCACCGG               |
| <i>ΔsigW::kan-P3</i> | GTTGACCAGTGCTCCCTGGTGGGGTGATGAAATGAGCTG                    |
| <i>ΔsigW::kan-P4</i> | TCCATCAGCCATTGAAGTGTGCTGAG                                 |
| <i>ΔsigX::kan-P1</i> | TGACGCTTCAAGGCAGATCATGGGT                                  |
| <i>ΔsigX::kan-P2</i> | CTGAGCGAGGGAGCAGAATTGAAACCCCTCCGTTCACTTTTTTTGTGCG          |
| <i>ΔsigX::kan-P3</i> | GTTGACCAGTGCTCCCTGAGACCATCGTTCGCCTCAGGATATT TACAA          |
| <i>ΔsigX::kan-P4</i> | TGCATCTGATATGTCATATTTGCCGA                                 |
| <i>ΔsigM::kan-P1</i> | GATCCATCTGACAGCCAAGTGAATCAC                                |
| <i>ΔsigM::kan-P2</i> | CTGAGCGAGGGAGCAGAATGCCTTTTCTCCCCTCTATGTTATAC               |
| <i>ΔsigM::kan-P3</i> | GTTGACCAGTGCTCCCTG GATCCATCTG ACAGCCAAGT GAATCAC           |
| <i>ΔsigM::kan-P4</i> | CTGGATTTCCTTGGTTGGCCCTGTAAC                                |
| <i>ΔsigV::cm-P1</i>  | ACCTCAATTTTACAGAATATGAATCGAAAGC                            |
| <i>ΔsigV::cm-P2</i>  | CTGAGCGAGGGAGCAGAATGCAATAAAGGGCTCCTTTTTGAATATACG           |
| <i>ΔsigV::cm-P3</i>  | GTTGACCAGTGCTCCCTGTGGATAAGAGATTACAGCA ATTAAGAGAAGAAT       |
| <i>ΔsigV::cm-P4</i>  | ATGTATCGATGATGCTGTGTCTTGTGATAC                             |
| <i>sigX-U-SalI</i>   | TAGGTCGACAAAGGAGGTGAAATGTACAC ATGGAAGAAACCTTTCAATTATTATATG |
| <i>sigX-L-NheI</i>   | TAGGCTAGCTTAACTGCCGGAAGTTGACTTAACAAC                       |
| <i>ΔdltA::cm-P1</i>  | CCAGCTGCTGCTGGCACAATATAGACA                                |
| <i>ΔdltA::cm-P2</i>  | CTGAGCGAGGGAGCAGAAAGTTATTCTCTCTCCAATTAGAAATCGTTA           |
| <i>ΔdltA::cm-P3</i>  | GTTGACCAGTGCTCCCTGATAAAGAATAAAAACGAGCTGTAAGGCG             |
| <i>ΔdltA::cm-P4</i>  | ATATATTGCGGCGCGAGCCCGTGC                                   |
| <i>dltA-MfeI-U</i>   | TAGCAATTGCATGCGGACACATTTATGTTTTGCGGA                       |
| <i>dltA-XhoI-L</i>   | TAGCTCGAGTACAAGAACCTCTTCGCCAATGCG                          |
| <i>ΔyceC::cm-P1</i>  | CTGCCTCTTCATCTGTTTTTGGCG                                   |
| <i>ΔyceC::cm-P2</i>  | CTGAGCGAGGGAGCAGAAACGATTCACTCCTACTCATCAAATGTGAA            |
| <i>ΔyceH::cm-P3</i>  | GTTGACCAGTGCTCCCTGTAAAAACCCCGCTTGTGGAACATAAGCG             |
| <i>ΔyceH::cm-P4</i>  | GCTTCCTGCTGTGCCAATCAAGTAA                                  |
| <i>ΔyrhH::cm-P1</i>  | ATTTTTAGAAAAAGATGTTTACAAAATGGA                             |

|                      |                                                       |
|----------------------|-------------------------------------------------------|
| <i>ΔyrhH::cm-P2</i>  | CTGAGCGAGGGAGCAGAATTTAAACACCTGCTTTTGGTTTCCTATGTT      |
| <i>ΔyrhH::cm-P3</i>  | GTTGACCAGTGCTCCCTGAAAATTTCTCGGGAAATATATCCAAGATC       |
| <i>ΔyrhH::cm-P4</i>  | GTGGCCGGACACAAAAACACTGGATA                            |
| <i>ΔyabM::cm-P1</i>  | AGACAAATCGGACTGGGAATGGAAGGG                           |
| <i>ΔyabM::cm-P2</i>  | CTGAGCGAGGGAGCAGAACCAAAAGCTCCTTCCCAACGTCAGGGGC        |
| <i>ΔyabQ::cm-P3</i>  | GTTGACCAGTGCTCCCTGAAGGAGGACCGTCTGGTTTGAA              |
| <i>ΔyabQ::cm-P4</i>  | CAAAGGTTTGTCTCTTTCGTCAACAG                            |
| <i>ΔywbO::cm-P1</i>  | TGAAAAGCAGGGAGGCGGGACATCTGC                           |
| <i>ΔywbO::cm-P2</i>  | CTGAGCGAGGGAGCAGAAGATAATCTCCTTTCATACTAAATTG           |
| <i>ΔywbO::cm-P3</i>  | GTTGACCAGTGCTCCCTGGGAAAAGCTCTCGATAAAGAGAGCTT          |
| <i>ΔywbO::cm-P4</i>  | GATTTTCGATTATCGTGTTTTTCGAAATTC                        |
| <i>ΔcsbB::kan-P1</i> | CTCCATGGATTTCTGAGTTTTGGTACGG                          |
| <i>ΔcsbB::kan-P2</i> | CTGAGCGAGGGAGCAGAATAAGGCACCTTCTTTTTATTATTCTTTTTAAG    |
| <i>ΔcsbB::kan-P3</i> | GTTGACCAGTGCTCCCTGAAATACCAAGCGCCATTGGCAGTGCTTTTT TTGC |
| <i>ΔcsbB::kan-P4</i> | CACACGGTTTTTGTA AAAAGAAATAATAAAC                      |
| <i>ΔpssA::mls-P1</i> | GATTGAGTCGGAAGCATTCTATGTTTC                           |
| <i>ΔpssA::mls-P2</i> | CTGAGCGAGGGAGCAGAAAGTGTAACCAAACCTCCAATTG              |
| <i>ΔpssA::mls-P3</i> | GTTGACCAGTGCTCCCTGTTCAGCAGCTCATAGCGGATTACGGT          |
| <i>ΔpssA::mls-P4</i> | CATCTTTCCCGTATTTTAAGCC                                |
| <i>ΔbcrC::cm-P1</i>  | TGCTCGGAGCGGTATCTGGGGCAATCGCC                         |
| <i>ΔbcrC::cm-P2</i>  | CTGAGCGAGGGAGCAGAAATAATCACCTTTTACATTTTTATATTTAG       |
| <i>ΔbcrC::cm-P3</i>  | GTTGACCAGTGCTCCCTGGAAAGACAAAAGCCGGCGTCTGAAATCA AGAC   |
| <i>ΔbcrC::cm-P4</i>  | TGTTAAAGCTGAAAAAGATCCAGTGCTGGGAG                      |
| <i>ΔywnJ::cm-P1</i>  | CAGAAAAGTGTTTCAGAATGTTGCTGAGG                         |
| <i>ΔywnJ::cm-P2</i>  | CTGAGCGAGGGAGCAGAAGACATAACCTCCTTTATAACGTAC            |
| <i>ΔywnJA::cm-P3</i> | GTTGACCAGTGCTCCCTGAGCCGGCTGTCTTGATTTTCAGACGCCG        |
| <i>ΔywnJ::cm-P4</i>  | GGGGTAAAAATAGAAAGCAATGT                               |
| <i>ΔtagU::cm-P1</i>  | CTTTTCACAGCGCCATATGATTTTCAGCTTG                       |
| <i>ΔtagU::cm-P2</i>  | CTGAGCGAGGGAGCAGAACCTTTGCACCTCGTCTGTAAATTAC           |
| <i>ΔtagU::cm-P3</i>  | GTTGACCAGTGCTCCCTGAACAAAAGAAGCTTCGCACAATGTGC          |
| <i>ΔtagU::cm-P4</i>  | GAACATTATGAAGGAGCGGCAGA                               |
| <i>Δabh::mls-P1</i>  | GGTTTTTGAAGACCTGTACAGAGGTCAC                          |

|                         |                                                            |
|-------------------------|------------------------------------------------------------|
| <i>Δabh::mls-P2</i>     | CTGAGCGAGGGAGCAGAAAAAACCCCTTCTTCCTTTAAATGTTTC              |
| <i>Δabh::mls-P3</i>     | GTTGACCAGTGCTCCCTGAATTATGCTAAAAAAGGCGGAGTGATATCA           |
| <i>Δabh::mls-P4</i>     | GCAGCAGCAGCTCGCTGAGCACTAAATC                               |
| <i>ΔfatR::mls-P1</i>    | CAATGCAGCAGCAAAGGCTGTATGTATTCC                             |
| <i>ΔfatR::mls-P2</i>    | CTGAGCGAGGGAGCAGAAGTAATCTGACAACCTCCGATTTCGTTTACGG          |
| <i>ΔyrhJ::mls-P3</i>    | GTTGACCAGTGCTCCCTGAATATAAAATCCCGCCAATCTGATT GG             |
| <i>ΔyrhJ::mls-P4</i>    | GGGAATACAAGTCTTTTAATCAG                                    |
| <i>Δspx::mls-P1</i>     | GATACTGATACAGAAAAACGCCTGAGGTTT                             |
| <i>Δspx::mls-P2</i>     | CTGAGCGAGGGAGCAGAATCATCTTCACTCCTCTAATTAGTAGGATGAACATCTATTT |
| <i>Δspx::mls-P3</i>     | GTTGACCAGTGCTCCCTGTAGATCGTATCATCAAAGAAGGCTGAGTCAT          |
| <i>Δspx::mls-P4</i>     | ATTTCTCTGCTCGTCATTGTTGGGATT                                |
| <i>BamHI-NotI-gfp-U</i> | TAGggatccTAGGCGGCCGCcAGTAAAGGAGAAGAAGAACTTTTCACTGGAGTTG    |
| <i>gfp-EcoRI-L</i>      | TAGgaattcTTATTTGTATAGTTCATCCATGCCATGTGTAATCC               |
| <i>psigX-U-BamHI</i>    | TAGggatccCGAGTCTGAATTTGCCGAAGAATC                          |
| <i>sigX-L-NotI</i>      | TAGGCGGCCGCACTGCCGGAAGTTGACTTAACA                          |
| <i>PsigX-L-NotI</i>     | TAGGCGGCCGCGTATCATATAATAATTGAAAGGTTTCTTCCATTTG             |

## References

- Jakutyte L, Baptista C, Sao-Jose C, Daugelavicius R, Carballido-Lopez R, Tavares P (2011) Bacteriophage infection in rod-shaped gram-positive bacteria: evidence for a preferential polar route for phage SPP1 entry in *Bacillus subtilis*. *J Bacteriol* 193: 4893-903
- Lemon KP, Grossman AD (1998) Localization of bacterial DNA polymerase: evidence for a factory model of replication. *Science* 282: 1516-9
- Mascher T, Hachmann AB, Helmann JD (2007) Regulatory overlap and functional redundancy among *Bacillus subtilis* extracytoplasmic function sigma factors. *J Bacteriol* 189: 6919-27
- Rosenberg A, Sinai L, Smith Y, Ben-Yehuda S (2012) Dynamic expression of the translational machinery during *Bacillus subtilis* life cycle at a single cell level. *PLoS One* 7: e41921
- Tzipilevich E, Habusha M, Ben-Yehuda S (2017) Acquisition of phage sensitivity by bacteria through exchange of phage receptors. *Cell* 168: 186-199 e12
- Youngman P, Perkins JB, Losick R (1984) A novel method for the rapid cloning in *Escherichia coli* of *Bacillus subtilis* chromosomal DNA adjacent to Tn917 insertions. *Mol Gen Genet* 195: 424-33
